# Supplementary material
Source: Springer Nature journal article supplement (https://www.springermedizin.de/resource/supplementary/13075_2010_2979_MOESM3_ESM.pdf/9693484)

A.

## Normal Dermal Fibroblast

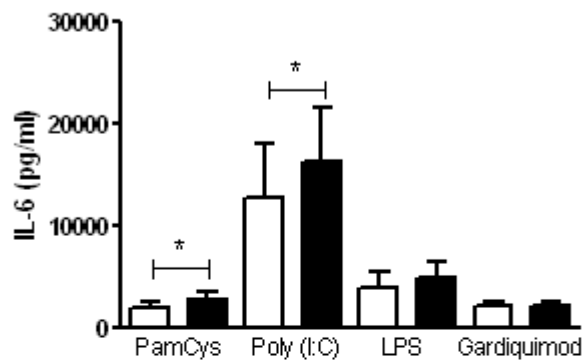

B.

## Scleroderma Dermal Fibroblasts

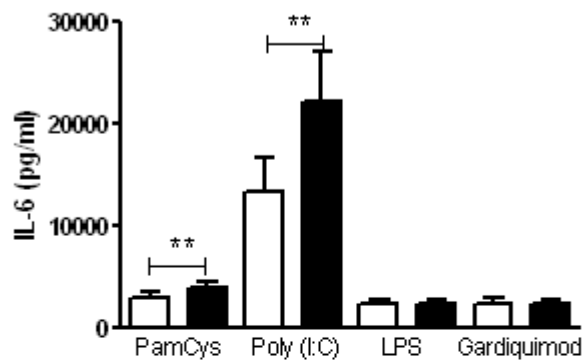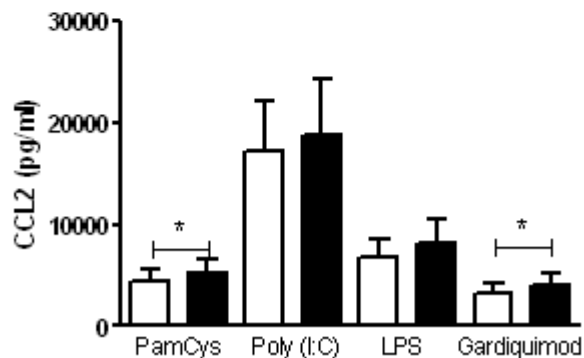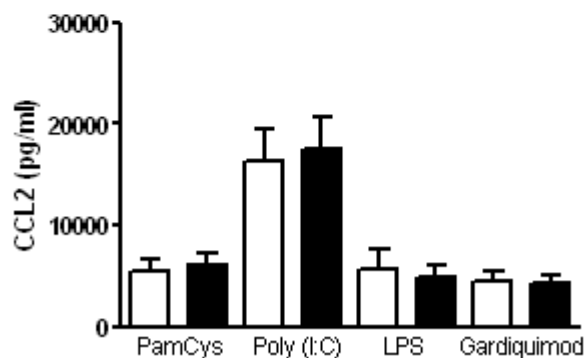

Supplement: MOESM3 [file 9693484]
